# Supplementary material for: Design Principles for Ligand-Sensing, Conformation-Switching Ribozymes
Source: PLoS Comput Biol. 2009 Dec 24;5(12):e1000620. doi: 10.1371/journal.pcbi.1000620 (PMC2789328; doi:10.1371/journal.pcbi.1000620)
Supplement: Text S2 — Derivation of equations (0.11 MB DOC) [file pcbi.1000620.s002.doc]

**Text S2**: Derivation of the transfer function for aptazymes as *in vivo* riboswitches

**Ligand-activated aptazymes***.*

Assuming that the kinetic parameters outlined in **Figure 3C** and the initial concentrations of each species are known, the concentration of each species at any time point can be obtained by integrating the differential equation set:

**(S.5)**

**(S.6)**

**(S.7)**

**(S.8)**

The steady-state concentrations of each species can be solved by setting equations **(S.5)**~**(S.8)** to zero. Then, to obtain insights into how the concentrations of different species behave as a function of ligand concentration we can determine how intact mRNA is partitioned amongst the conformations *I*, *A*, *B* and *BL*.

First we consider the steady-state ratio of *B* to *BL*, which is determined by the concentration of free ligand [*L*]. We assume that the total ligand concentration is much greater than the concentration of RNA, and therefore that free ligand concentration [*L*] approximates total ligand concentration [*L*tot]. Based on **(S.8)** at steady-state:

and thus:

. **(S.9)**

The ratio has a form similar to that of the dissociation constant, *K*d. Thus we term this ratio as . Formally:

**(S.10)**

We can divide *L*tot by to obtain a dimensionless measure of ligand concentration, . This allows **(S.9)** to be written as:

We next consider the ratio of [*A*] to [*I*], and the ratio of [*B*] to [*I*] at steady-state. By letting and in **(S.6)** and (**S.7)** we find:

For simplicity, we define the new parameters:

**(S.11)**

**(S.12)**

where *α* and *β* have similar meanings and values to the equilibrium constants for the reactions *I*↔*A* () and *I*↔*B* (), respectively, but are further affected by the degradation rate constant *k*Deg, the cleavage rate constant *k*Cle, and the dimensionless ligand concentration . It should be noted that although *β* is a function of , it can be viewed as a constant in most cases since the degradation rate constants for most eukaryotic mRNAs are much smaller (by up to 10 orders of magnitude; Al-Hashimi and Walter, 2008) than the rate constants for conformational change.

Therefore, the ratio of species *A*, *B*, and *BL* to *I* can be written as:

, ,

If we express the concentration of all intact mRNAs as [*R*], we then have:

and

Since all intact mRNA species have the same degradation rate, while only *B* and *BL* decay through aptazyme cleavage, we can further derive:

If we again define the steady-state intact mRNA concentration in the absence of aptazyme as 1 (as in **(18)**), then the relative intact mRNA concentration in the presence of aptazyme can be written as:

**Ligand-inhibited aptazymes.**

The model for a ligand-inhibited, self-cleaving ribozyme is diagramed in **Figure 3D**. The primary difference between this and the model for a ligand-activated aptazyme (**Figure 3C**) is that now only the conformer *A*, rather than both *B* and *BL*, can undergo self-cleavage. At steady state,

and,

.

Similarly we define the apparent dissociation constant for ligand-inhibited aptazyme as:

**(S.13)**

We then focus on the ratios of (*α*) and (*β*):

**(S.14)**

**(S.15)**

As before, *β* is a function of , but now can be treated as a constant (again assuming that the structural transition happens much faster than cleavage and degradation). The fraction of cleavage-competent conformer thereby becomes:

and therefore:
