# Supplementary material for: Design Principles for Ligand-Sensing, Conformation-Switching Ribozymes
Source: PLoS Comput Biol. 2009 Dec 24;5(12):e1000620. doi: 10.1371/journal.pcbi.1000620 (PMC2789328; doi:10.1371/journal.pcbi.1000620)
Supplement: Text S3 — Summary of terms (0.07 MB DOC) [file pcbi.1000620.s003.doc]

**Text S3**: Summary of terms

**General terms:**

- *K*int:*K*int is the equilibrium constant between the two conformers of the aptazyme in the absence of ligand.
- *ω*: Cleavage tendency *ω* is the fraction of cleavage-competent conformer in the absence of ligand.

**Terms in the context of aptazymes as in vitro biosensors:**

- *k*app:*k*app is the apparent cleavage rate constant when a self-cleaving aptazyme is tested *in vitro* under certain concentration of ligand.
- : Relative ligand concentration is the ratio of total ligand concentration to the *K*d of the aptamer domain to its ligand, or in equation, = [*L*tot]/*K*d.
- : is the concentration of total ligand at which the aptazyme is half-activated or half-inhibited.
- : is the relative ligand concentration at which the aptazyme is half-activated or half-inhibited, or in equation, = /*K*d. The relationships between and *ω* for ligand-activated aptazymes and ligand-inhibited aptazymes are shown in equations (8) and (14), respectively.
- : is the highest possible relative ligand concentration, or in other words, the highest possible ligand concentration divided by *K*d of the aptamer domain to its ligand.
- : For ligand-activated aptazymes, is the fold-increase of *k*app when ligand concentration increases from 0 to infinite. The relationship between and *ω* is shown in equation (9). is not defined for ligand-inhibited aptazymes.
- : is the fold-increase or fold-decrease of *k*app when ligand concentration increases from 0 to the highest possible ligand concentration for ligand-activated aptazymes and ligand-inhibited aptazymes, respectively. The dependences of on and *ω* for ligand-activated aptazymes and ligand-inhibited aptazymes are shown in equations (11) and (16), respectively.

**Terms in the context of aptazymes as in vivo riboswitches:**

- : Relative mRNA level is the steady-state concentration of mRNA that harbors an aptazyme or ribozyme at its 3′ UTR divided by the steady-state concentration of the same mRNA without an aptazyme or ribozyme. Thus when the cleavage activity of the aptazyme or ribozyme is zero, = 1; when the activity of the aptazyme or ribozyme is infinitely high, = 0.
- *D*: *D* is the ratio of the cleavage rate constant of a constitutively active ribozyme to the spontaneous degradation rate constant of the mRNA.
- *α*: *α* is the ratio of the concentration of conformer *A* to the concentration of conformer *I* (in Figure 3C and 3D) at steady state (see equations **S.11** and **S.14**).
- *β*: *β*  is the ratio of the concentration of conformer *B* to the concentration of conformer *I* (in Figure 3C and 3D) at steady state (see equations **S.12** and **S.15**).
- : is the apparent *in vivo* dissociation rate constant of the aptamer domain to its ligand in the presence of mRNA degradation and aptazyme cleavage. The definitions of for ligand-activated and ligand-inhibited aptazyme are shown in equations (**S.10** and **S.13**). usually has similar value to the true *K*d of the aptamer domain to its ligand.
- : Relative ligand concentration is the ratio of total ligand concentration to the of the aptazyme, or in equation, =[*L*tot]/.
- : is the concentration of total ligand at which the relative mRNA level is in the middle of the theoretical dynamic range of .
- : is the relative concentration of total ligand at which the relative mRNA level is in the middle of the theoretical dynamic range of , or in equation, =/. The dependences of on *ω* and *D* for ligand-activated aptazymes and ligand-inhibited aptazymes are shown in equations (27) and (37), respectively.
- : is the highest possible relative ligand concentration, or in other words, the highest possible ligand concentration divided by .
- : is the fold-increase or fold-decrease of when ligand concentration increases from 0 to infinite for ligand-inhibited aptazymes and ligand-activated aptazymes, respectively.
- : is the fold-increase or fold-decrease of when ligand concentration increases from 0 to the highest possible ligand concentration for ligand-inhibited aptazymes and ligand-activated aptazymes, respectively. The dependences of on , *ω* and *D* for ligand-activated aptazymes and ligand-inhibited aptazymes are shown in equations (29) and (39), respectively.
